# Supplementary material
Source: PubMed Central journal article supplement (PMC3322851)
Supplement: supp_M111.310581_jbc.M111.310581-1.pdf [file supp_M111.310581_jbc.M111.310581-1.pdf]

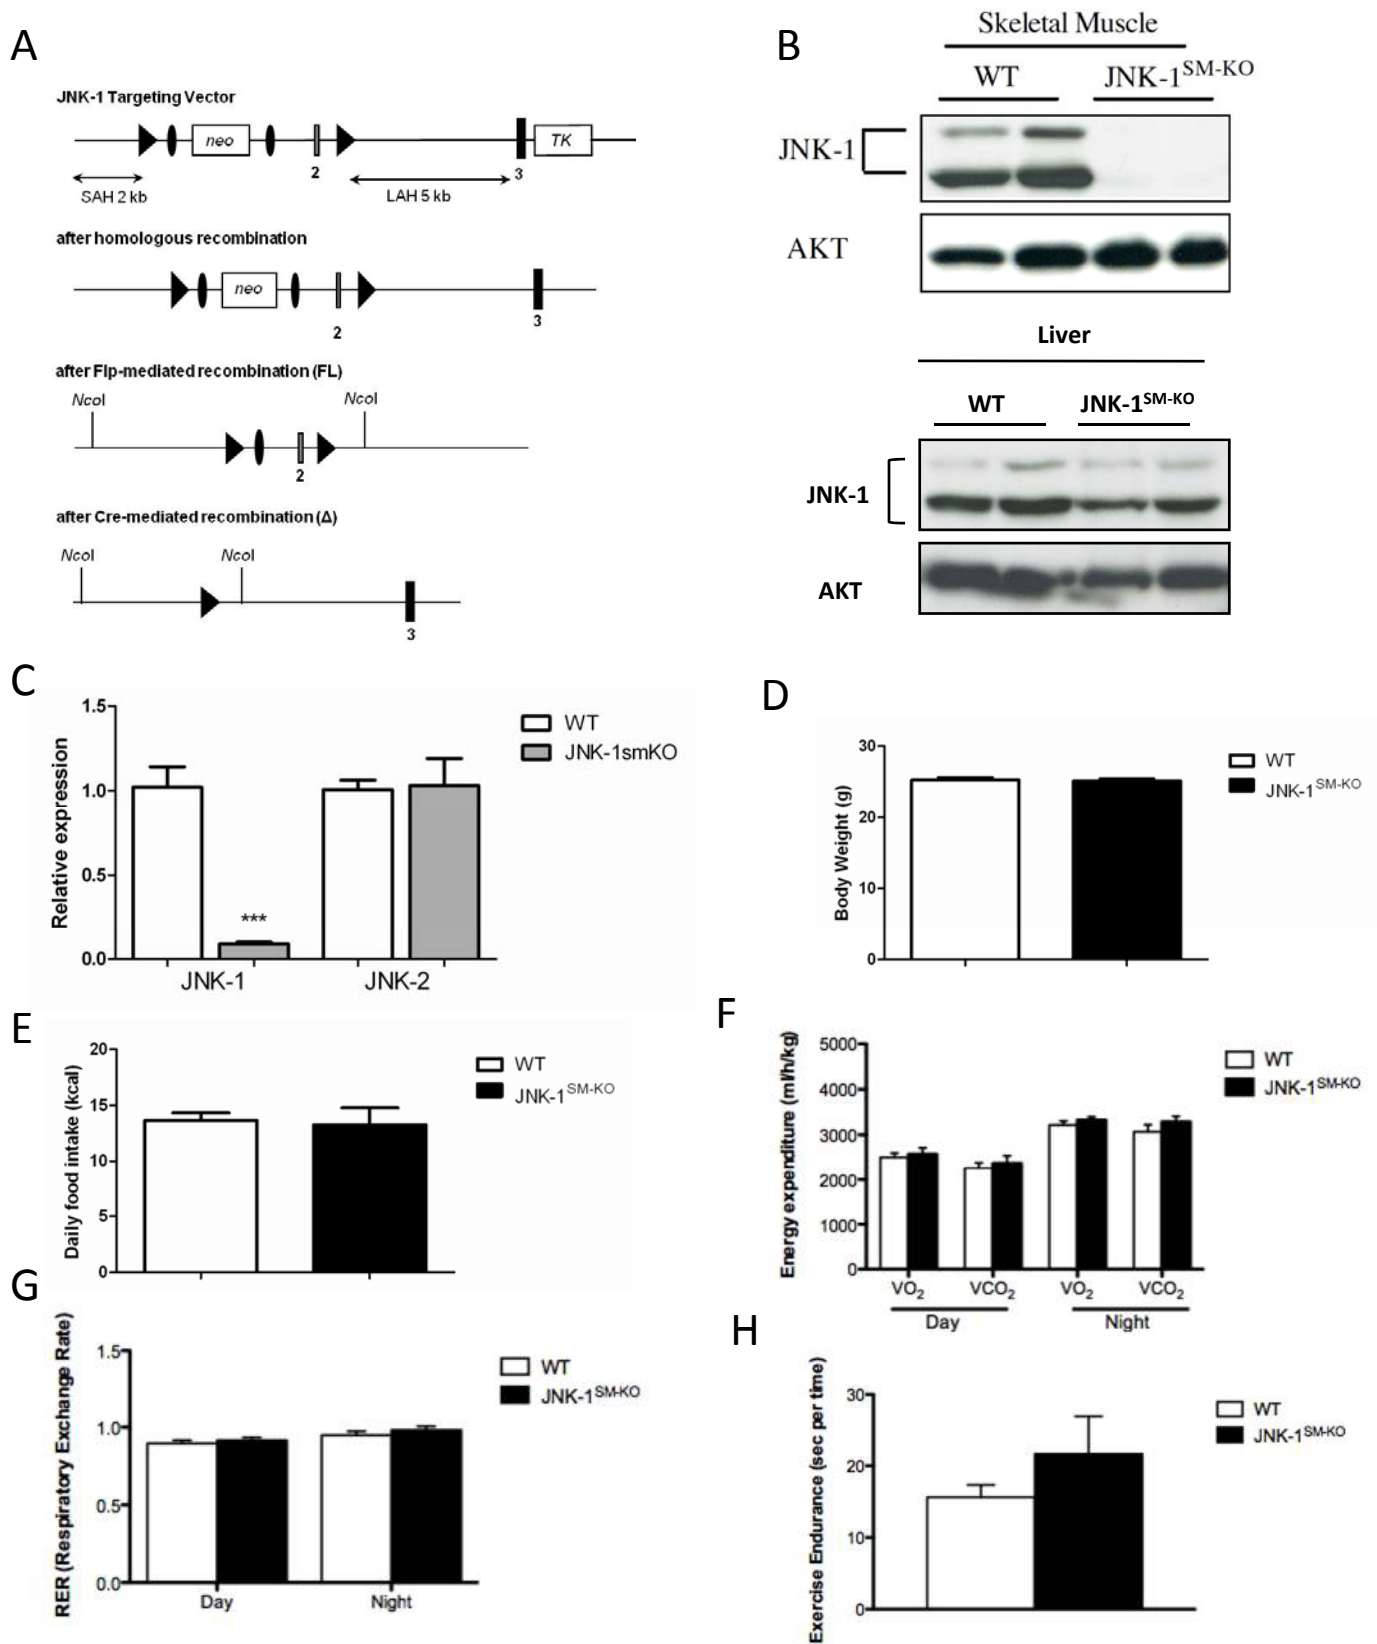

**SUPPLEMENTARY FIGURE 1.** (A) Targeting vector for generation of JNK-1 smKO mice (B) JNK-1 protein expression in skeletal muscle and liver lysates taken from wild type and muscle specific JNK-1 KO mice (C) JNK-1 and JNK-2 gene expression in littermate control and muscle specific JNK-1 KO mice. (D) Body weight, (E) Daily food intake, (F) energy expenditure, (G) RER and (H) exercise endurance. Data expressed as mean  $\pm$  SEM \* $P < 0.05$ , \*\*\* $P < 0.001$  compared to all other data points.

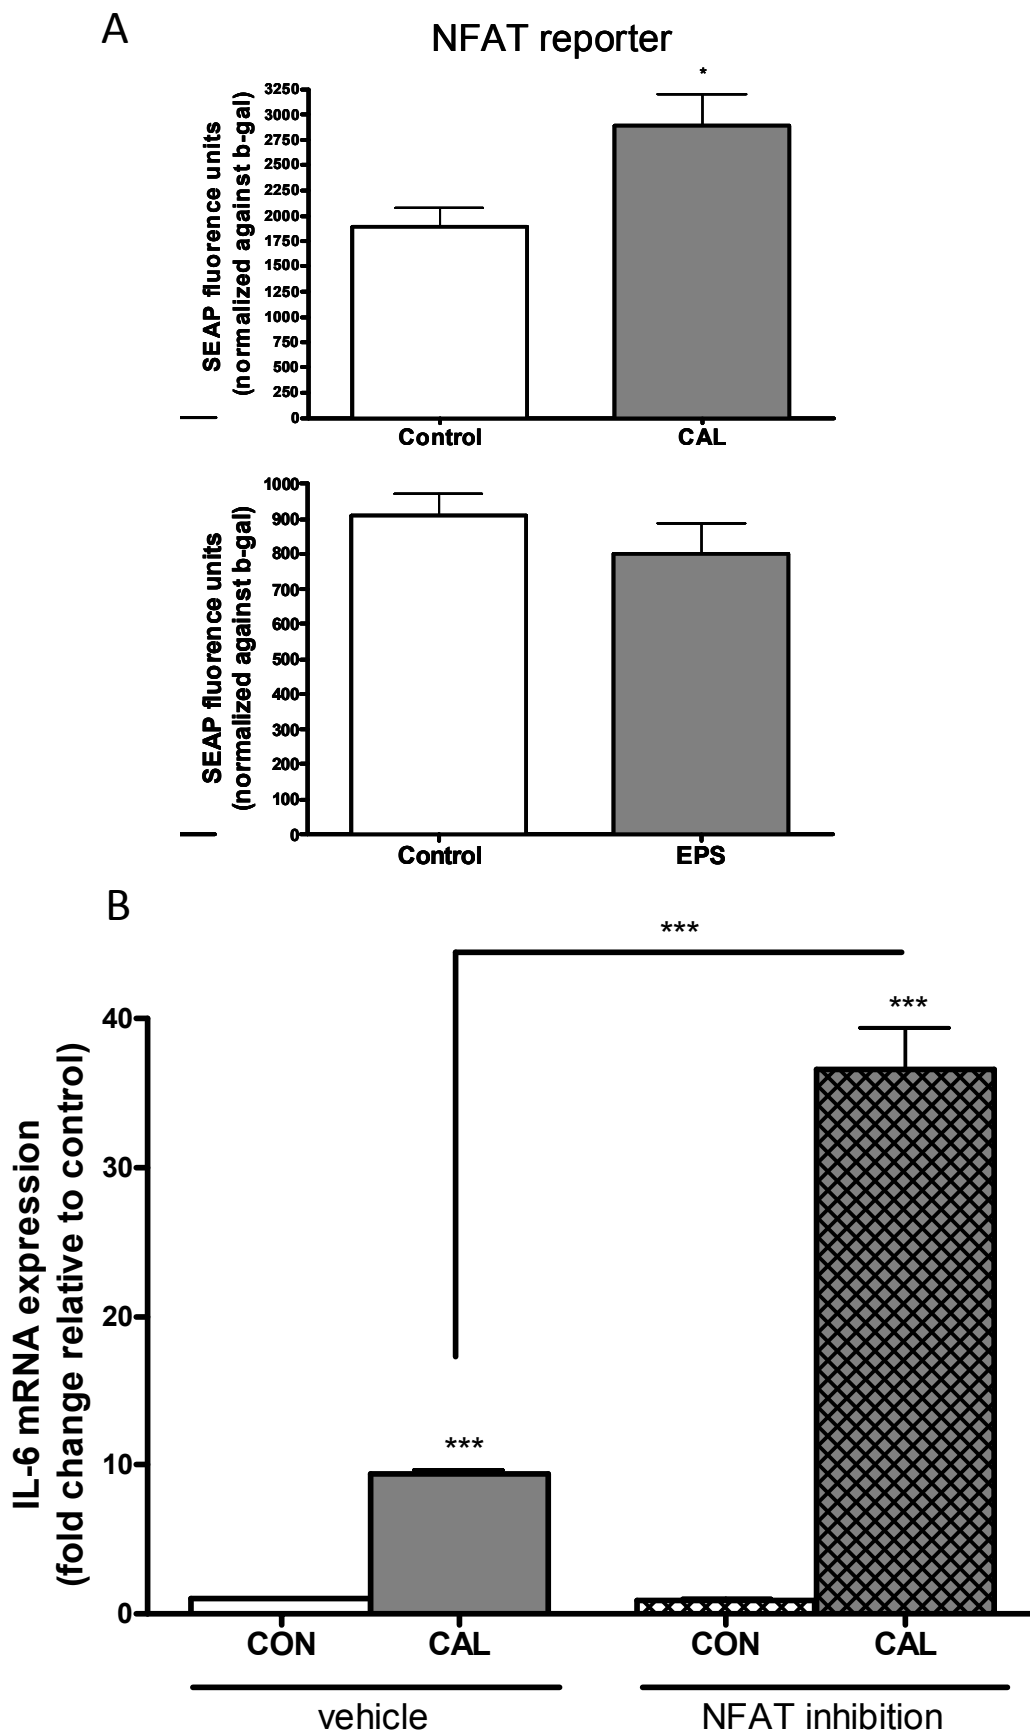

**SUPPLEMENTARY FIGURE 2.** (A) Effect of calcimycin and EPS (4 hours 40v, 1Hz, 10ms ) treatment on NFAT reporter activity in C2C12 myotubes \*P<0.05 N=6 from at least two independent experiments. (B) Effect of NFAT inhibition on calcimycin induced IL-6 mRNA expression in C2C12 myotubes. Data expressed as mean  $\pm$  SEM \*\*\*P<0.001 N=4-8 from at least two independent experiments.
